# Supplementary material for: Hormone-induced mitochondrial fission is utilized by brown adipocytes as an amplification pathway for energy expenditure
Source: EMBO J. 2014 Jan 15;33(5):418–36. doi: 10.1002/embj.201385014 (PMC3983686; doi:10.1002/embj.201385014)
Supplement: Supplementary file 8 [file embj0033-0418-sd8.pdf]

**Figure 3s**

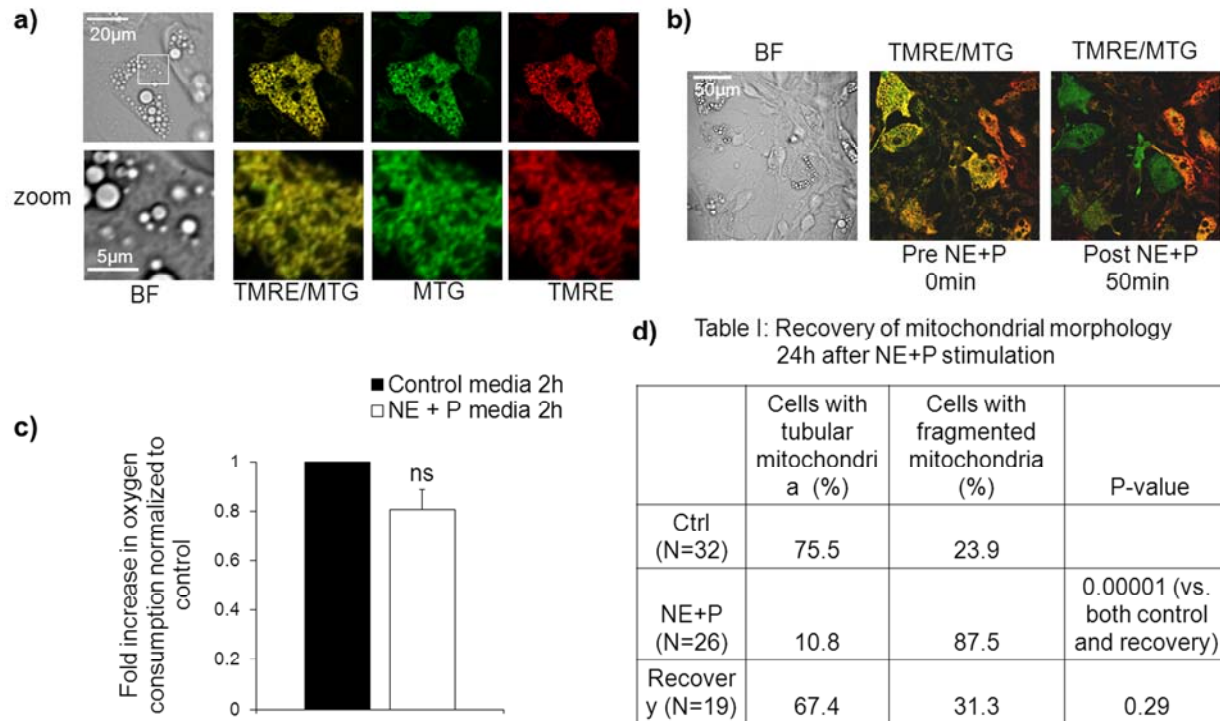

**Supplementary Figure 3. Recovery of mitochondrial morphology and  $\Delta\psi_m$  after NE and**

**palmitate stimulation.** Cells were exposed to NE plus palmitate for a period of 2 h. NE plus palmitate were then removed and cells were incubated in normal culture media for additional 24 h before images were acquired.

A) Cell stained with TMRE/MTG under unstimulated conditions. Note the intact  $\Delta\psi_m$ . Scale bar 20µm, and 5µm for the zoom images.

B) Recovery of function 24 h after a 2 h stimulation with NE plus palmitate or control media;  $\Delta\psi_m$  depolarization in response to NE and palmitate. Cells stained with TMRE/MTG. Scale bar 50µm.

C) Recovery of function 24 h after a 2 h stimulation with NE plus palmitate or control media; increase in oxygen consumption in response to NE. Data are normalized to the control cells response to NE (n=5 each condition).

D) Quantification of the recovery of mitochondrial morphology 24h after NE+Palmitate stimulation. Note that the mitochondrial fragmentation is recovered 24h after the NE+P was washed out.
